# Supplementary material for: Mitochondrial stress-activated cGAS-STING pathway inhibits thermogenic program and contributes to overnutrition-induced obesity in mice
Source: PubMed Central journal article supplement (PMC7244732; doi:10.1038/s42003-020-0986-1), 2020-05-22
Supplement: 42003_2020_986_MOESM1_ESM.pdf [file 42003_2020_986_MOESM1_ESM.pdf]

# Supplementary Fig. 1.

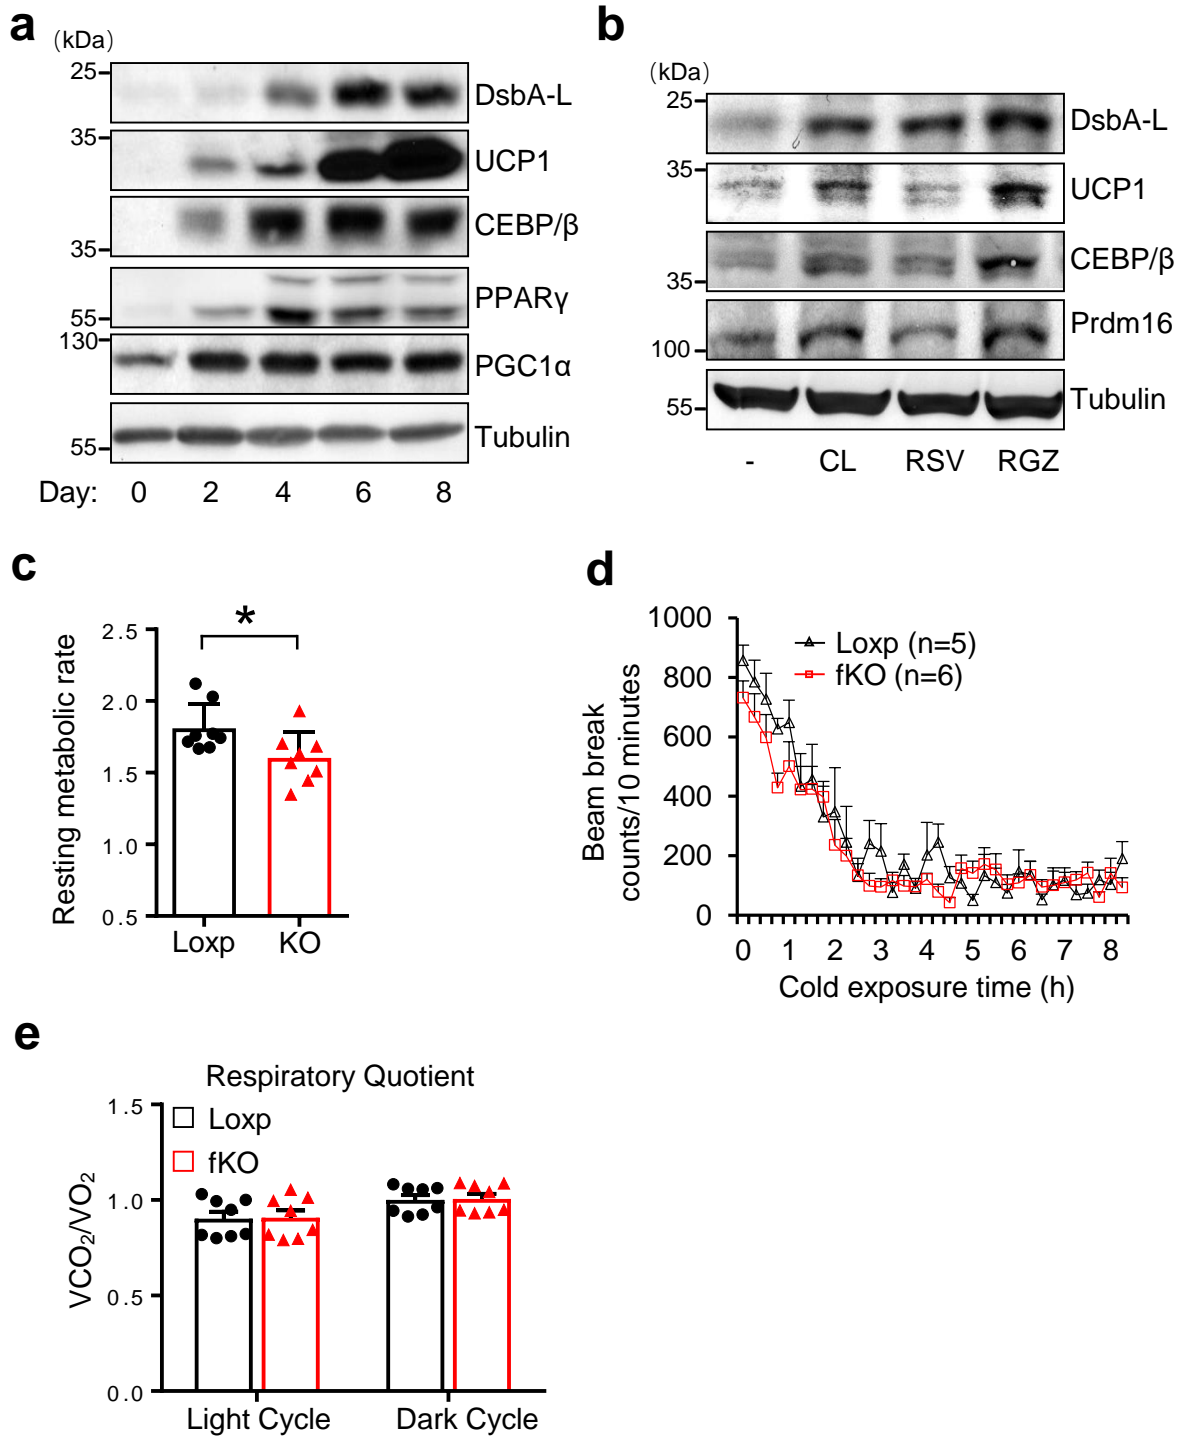

## Supplementary Figure 1. DsbA-L is positively correlated with thermogenic gene expression and resting metabolic rate.

**a** Immunoblot analysis of DsbA-L, UCP1, C/EBP $\beta$ , PPAR $\gamma$  and PGC1 $\alpha$  expression during brown adipocyte differentiation. **b** Immunoblot analysis of DsbA-L, UCP1, C/EBP $\beta$  and Prdm16 expression in brown adipocytes treated with CL316243, resveratrol or rosiglitazone for 16 hr. **c** Resting metabolic rate of DsbA-L<sup>fKO</sup> and loxp control mice. **d** The activities of DsbA-L<sup>fKO</sup> and loxp control mice (n=8 for each group) exposed to cold (4°C) under the feeding conditions at different time points as indicated. **e** The respiratory quotient of DsbA-L<sup>fKO</sup> and loxp control mice (n=8 for each group) was measured during a 48 hr period, including two light/dark cycles. Data are presented as mean  $\pm$  SEM of biologically independent samples, \*p < 0.05 by unpaired two-tailed t-test.

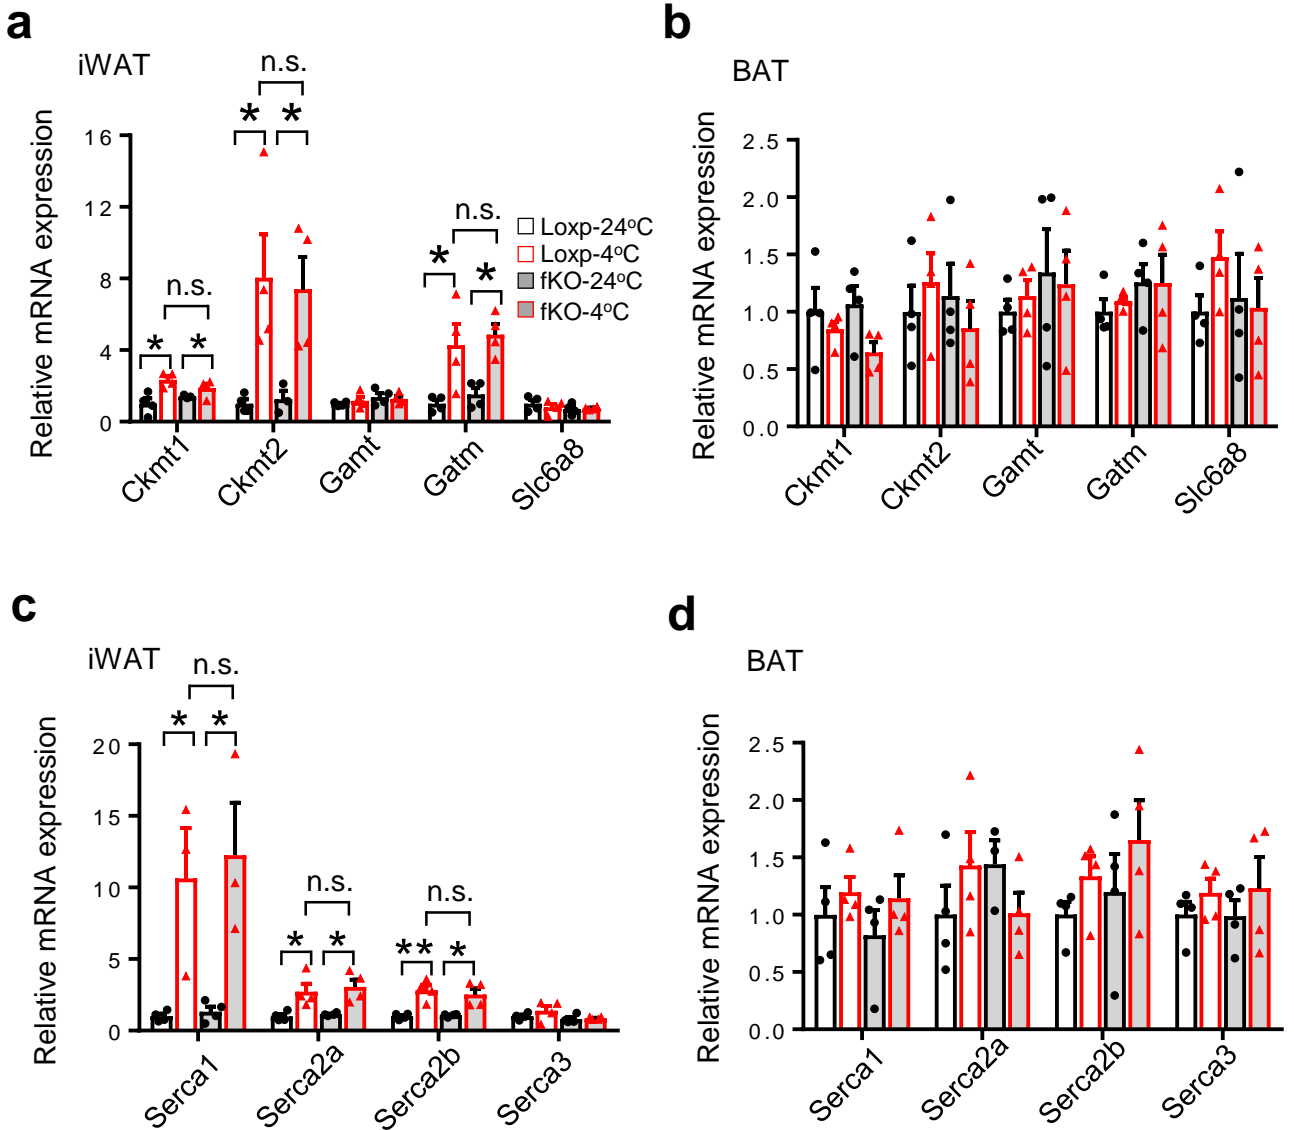

**Supplementary Figure 2. Fat-specific knockout of DsbA-L has no effect on creatine and calcium cycle-related gene expression in mice.**

**a-b** The mRNA levels of creatine-metabolism-related genes in **(a)** iWAT and **(b)** BAT of DsbA-L<sup>fKO</sup> and loxp control mice (n=4 for each group) were determined by qPCR and normalized to  $\beta$ -actin. **c-d** The mRNA levels of calcium cycle-related genes in **(c)** iWAT and **(d)** BAT of DsbA-L<sup>fKO</sup> and loxp control mice (n=8 for each group) were determined by qPCR and normalized to  $\beta$ -actin. Data are presented as mean  $\pm$  SEM of biologically independent samples, \*p < 0.05 and \*\*p < 0.01 by one-way ANOVA.

# Supplementary Fig. 3.

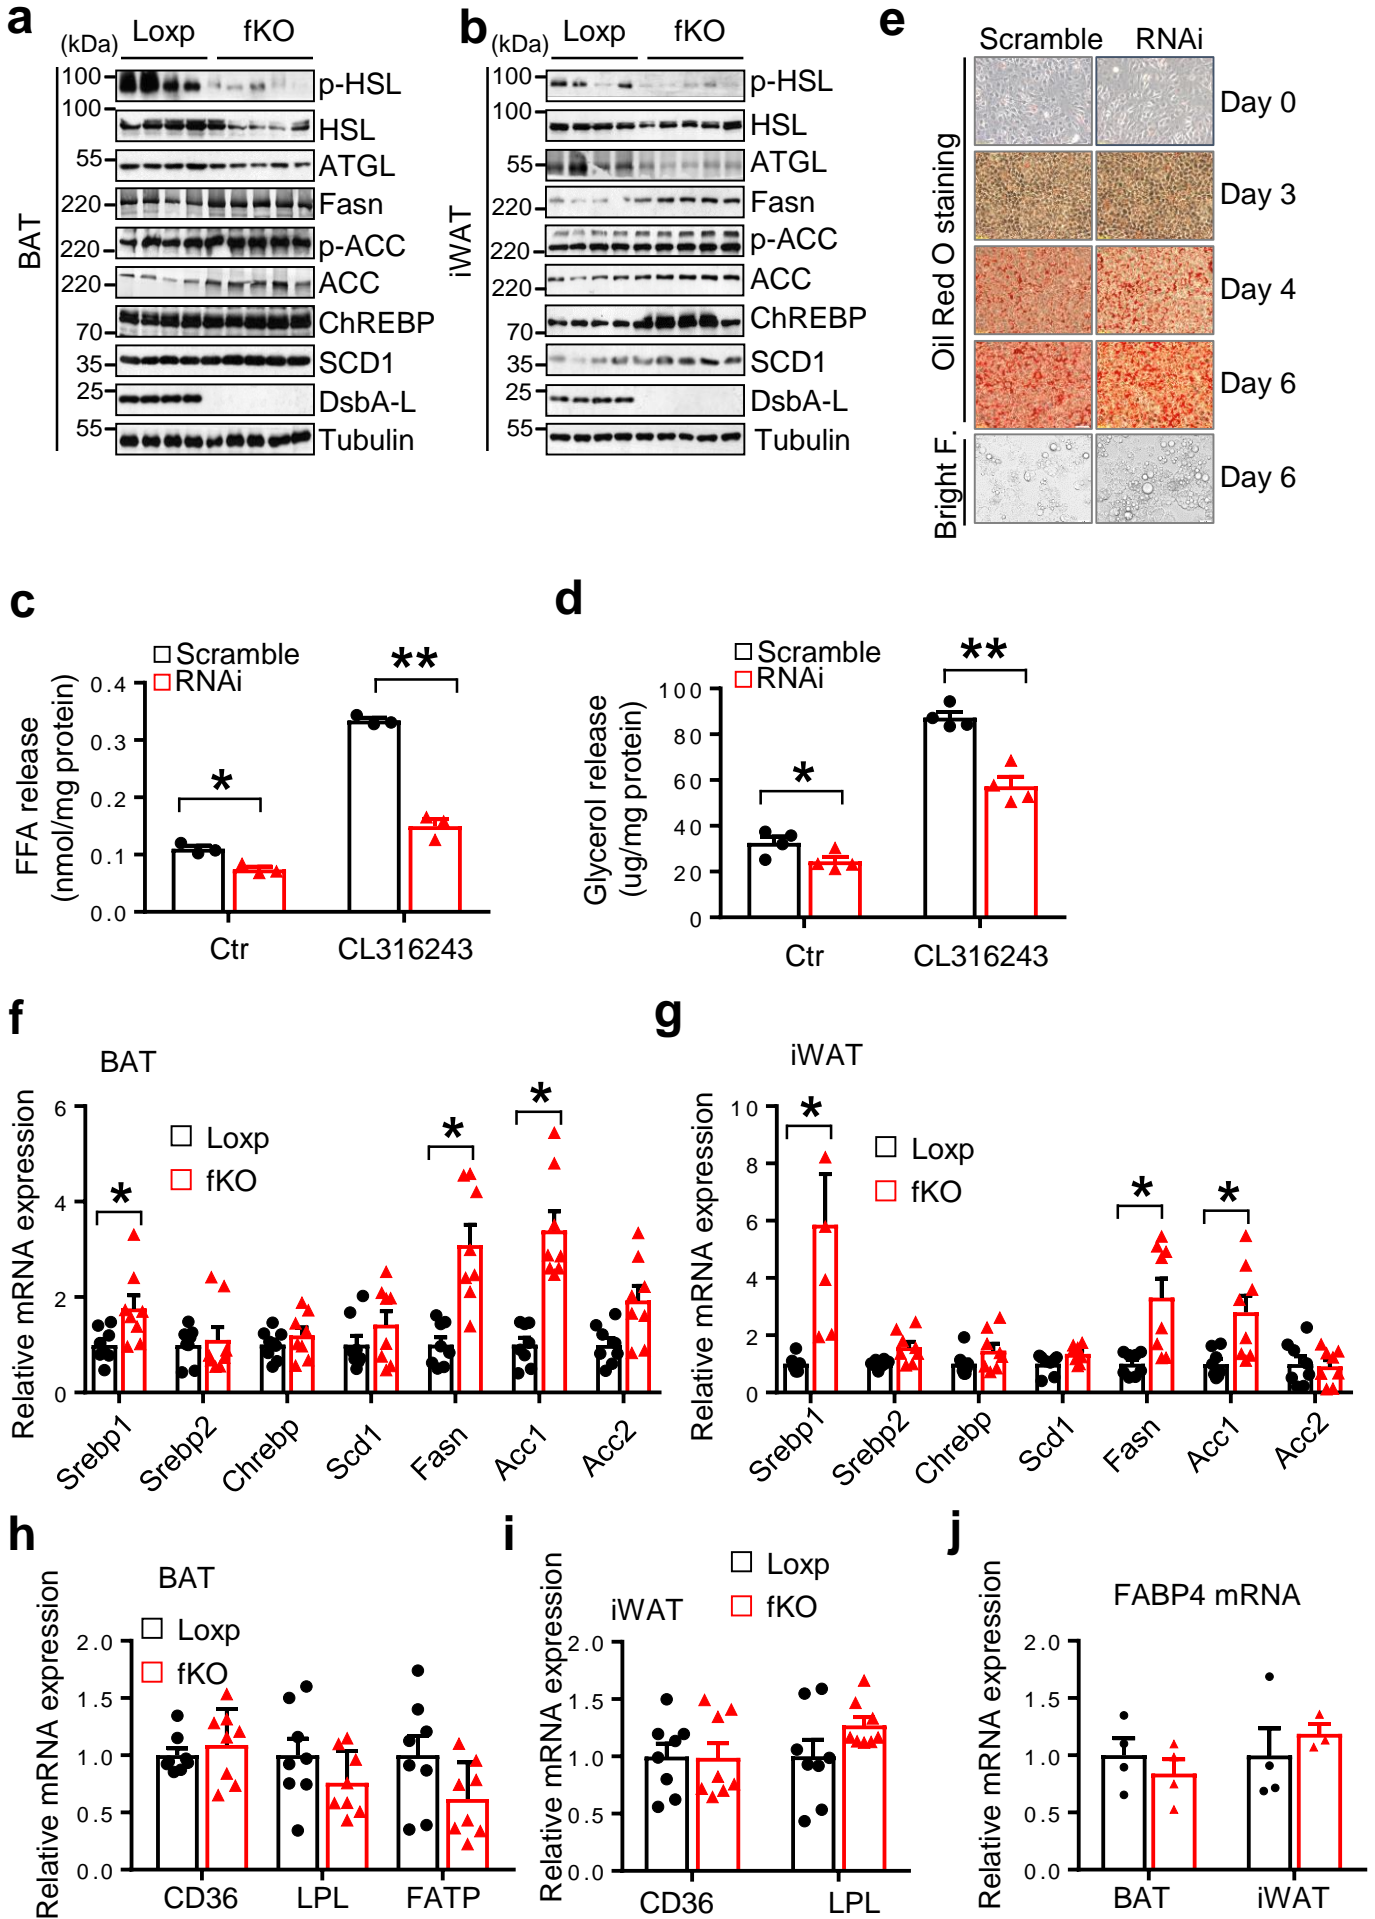

**Supplementary Figure 3. Fat-specific knockout of DsbA-L impairs lipid metabolism.**

**a-b** Immunoblot analysis of the expression of lipid metabolism-related genes such as ATGL, FASN, ChREBP, SCD1 and the phosphorylation of ACC and HSL in **(a)** BAT and **(b)** iWAT of DsbA-L<sup>fKO</sup> (n=4) and loxp control (n=5) mice. **c** Free fatty acid and **d** glycerol release from DsbA-L-suppressed brown adipocytes treated with or without 1 $\mu$ M CL316243 (n=3 for each group) for 16 hr. **e** Representative Oil Red O stain or bright field photo during DsbA-L-suppressed brown adipocytes or scramble control cells differentiation. **f-g** The mRNA levels of lipid synthesis genes in **(f)** BAT and **(g)** iWAT of DsbA-L<sup>fKO</sup> and loxp control mice (n=8 for each group). **h-i** The mRNA levels of lipid uptake-related genes in **(h)** BAT and **(i)** iWAT of DsbA-L<sup>fKO</sup> and loxp control mice (n=8 for each group) were determined by qPCR and normalized to  $\beta$ -actin. **j** The mRNA levels of FABP4 in BAT and iWAT of DsbA-L<sup>fKO</sup> and loxp control mice (n=4 for each group). Data are presented as mean  $\pm$  SEM of biologically independent samples, \*p < 0.05 and \*\*p < 0.01 by unpaired two-tailed t-test.

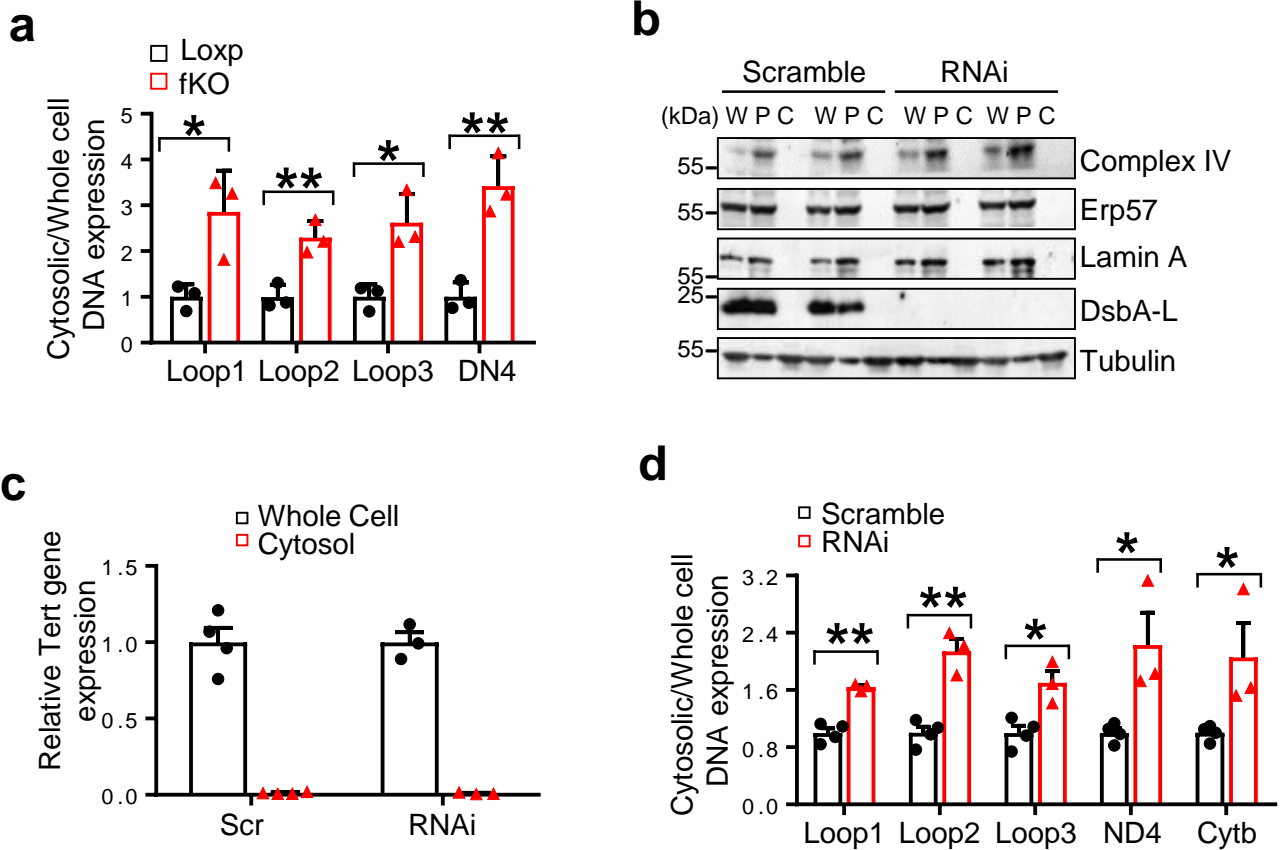

**Supplementary Figure 4. DsbA-L deficiency results in increased mtDNA release into the cytosol in brown adipocytes.**

**a** Cytosolic mtDNA content was quantitated via qPCR using mtDNA primers (Dloop1-3 and mtND4) in primary brown adipocytes from DsbA-L<sup>fKO</sup> and loxp control mice (n=3 for each group). **b** Scramble and DsbA-L-suppressed brown adipocytes were subjected to digitonin fractionation. Whole-cell extracts (W), pellets (P) and cytosolic extracts (C) were immunoblotted using indicated antibodies. **c** The expression of nuclear-encoded Tert gene in whole-cell and cytosolic extract was measured from scramble (n=4) and DsbA-L-suppressed (n=3) brown adipocytes, indicating the high purity of cytosol fraction. **d** Cytosolic mtDNA content was quantitated via qPCR using mtDNA primers (Dloop1-3, mtND4 and Cytb) in brown scramble (n=4) and DsbA-L-suppressed (n=3) adipocytes. Data are presented as mean ± SEM of biologically independent samples, \*p < 0.05 and \*\*p < 0.01 by unpaired two-tailed t-test.

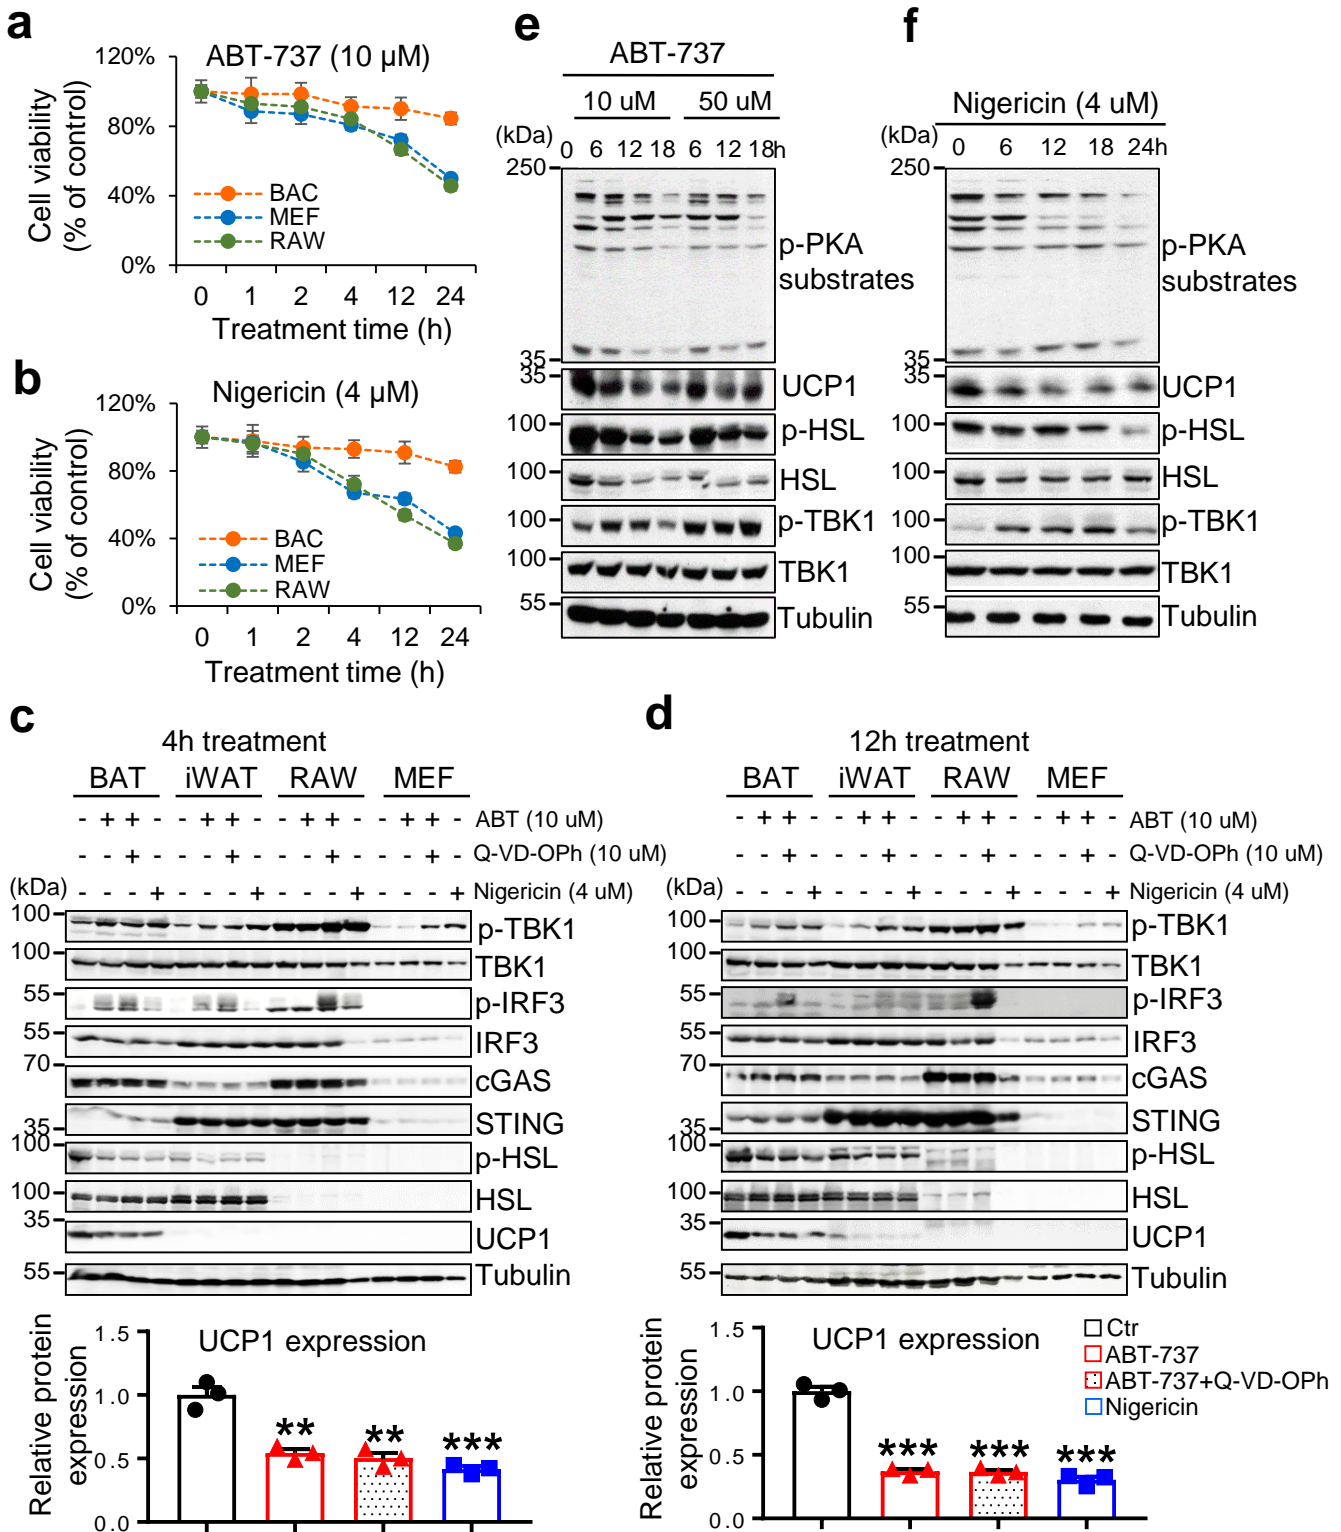

**Supplementary Figure 5. mtDNA release-induced activation of the cGAS-STING pathway inhibits PKA signaling in brown adipocytes.**

**a-b** MTT assay indicated cell viability of brown adipocytes (BAC), MEF and RAW264.7 cells treated with (a) 10  $\mu$ M ABT-737 or (b) 4  $\mu$ M nigericin at different time points as indicated. **c-d** Immunoblot analysis of the phosphorylation of TBK1, IRF3, HSL and UCP1, cGAS, STING expression in primary brown adipocytes, primary inguinal adipocytes, RAW264.7 and MEF cells treated with 4  $\mu$ M nigericin or 10  $\mu$ M ABT-737 in the presence or absence of Q-VD-OPh for (c) 4h or (d) 12 hr ( $n=3$  for each group). The data was semi-quantified by Image J program. **e** Immunoblot analysis of UCP1 expression and the phosphorylation of PKA substrates, HSL, TBK1 and IRF3 in brown adipocytes treated with 10  $\mu$ M or 50  $\mu$ M ABT-737 at different time points as indicated. **f** Immunoblot analysis of UCP1 expression and the phosphorylation of PKA substrates, HSL, TBK1 and IRF3 in brown adipocytes treated with 4  $\mu$ M nigericin at different time points as indicated.

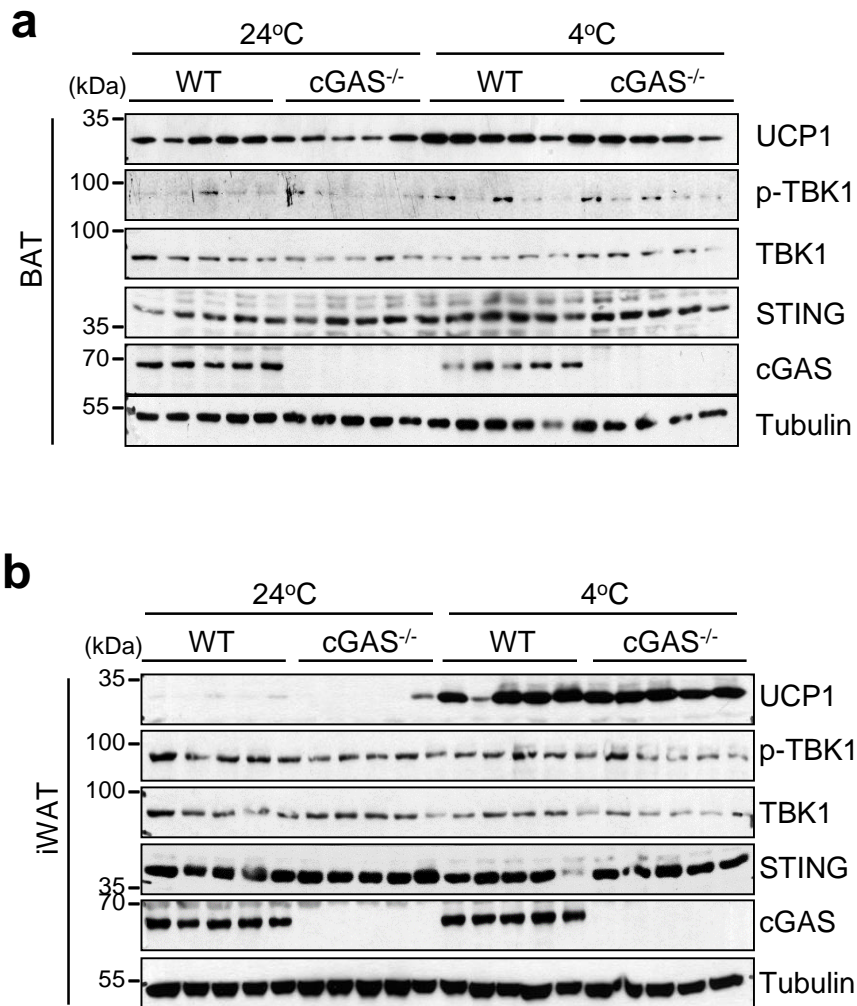

**Supplementary Figure 6. Knockout of cGAS has no effect on UCP1 expression in mice.** **a** Immunoblot analysis of UCP1, cGAS, STING expression and the phosphorylation of TBK1 in BAT from wild-type and cGAS knockout mice exposed to cold (4°C) or housed at room temperature (24°C) (n=5/group). **b** Immunoblot analysis of UCP1, cGAS, STING expression and the phosphorylation of TBK1 in iWAT from wild-type and cGAS knockout mice exposed to cold (4°C) or housed at room temperature (24°C) (n=5 for each group).

**Fig. 1c**

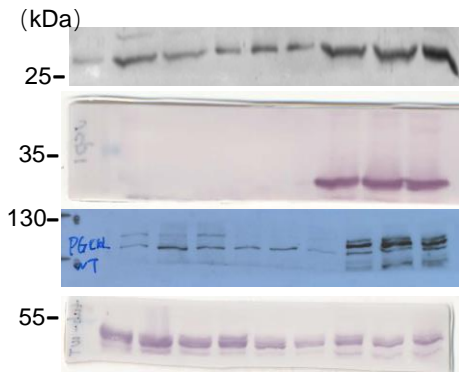

**Fig. 2c**

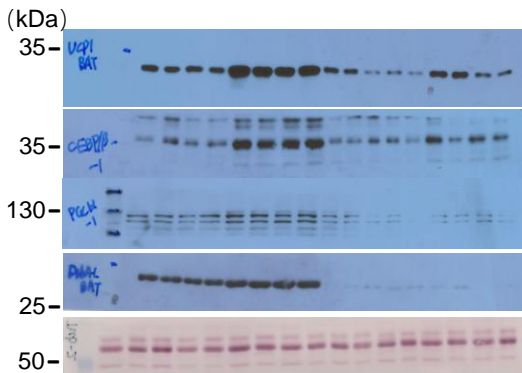

**Fig. 2d**

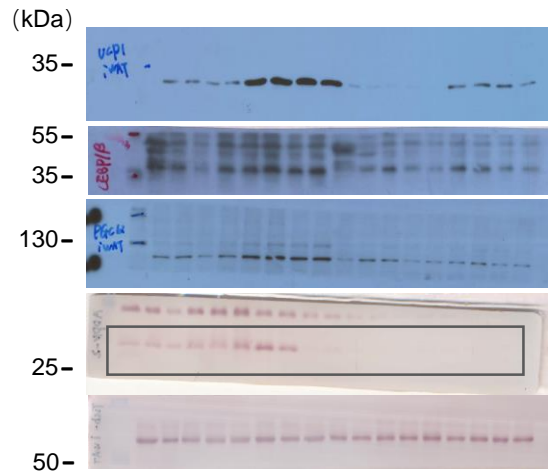

**Fig. 2f**

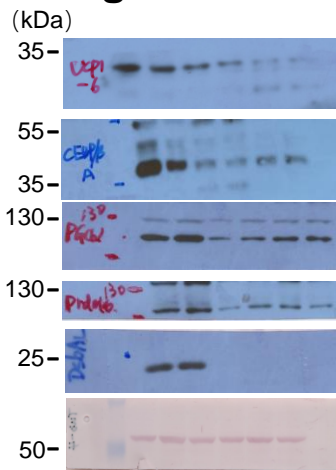

**Fig. 2g**

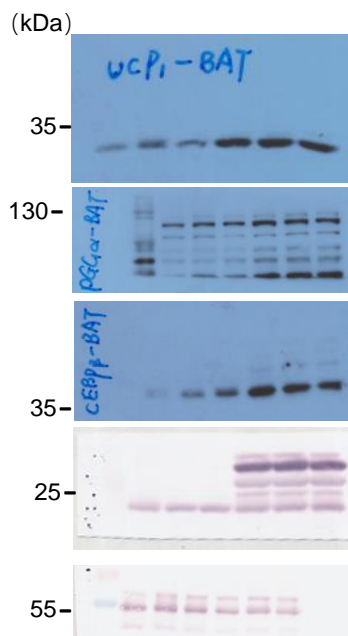

**Fig. 2h**

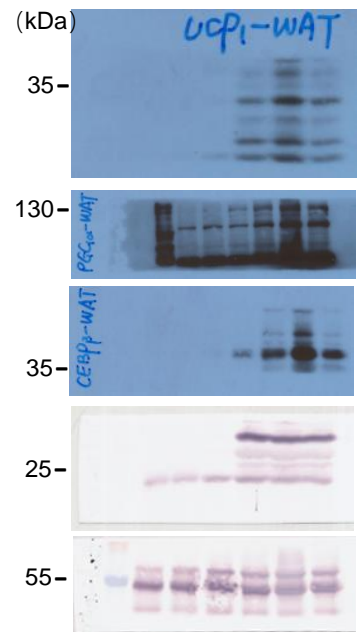



**Fig. 4b**

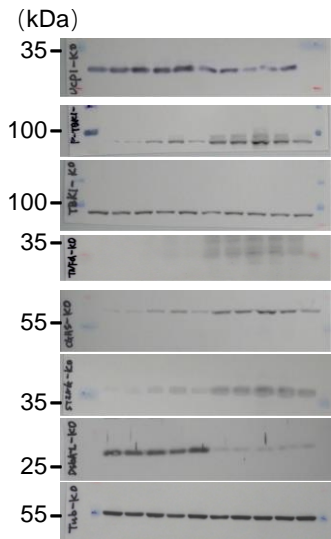

**Fig. 4c**

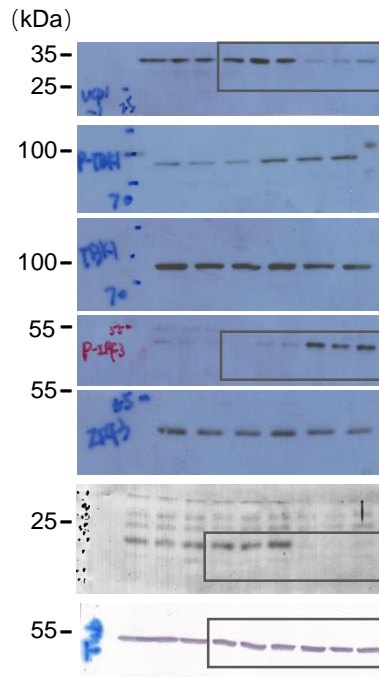

**Fig. 4e**

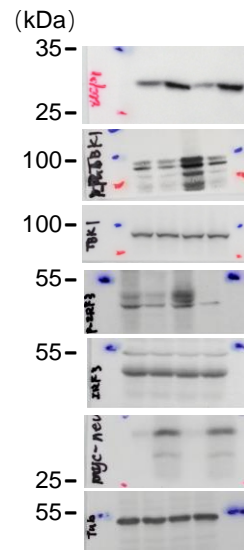

**Fig. 4f & Fig. 4g**

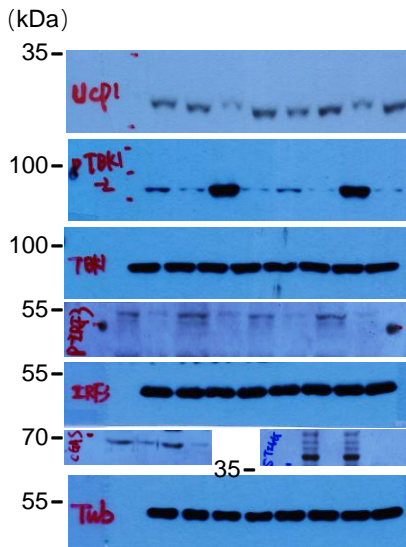

**Fig. 4h**

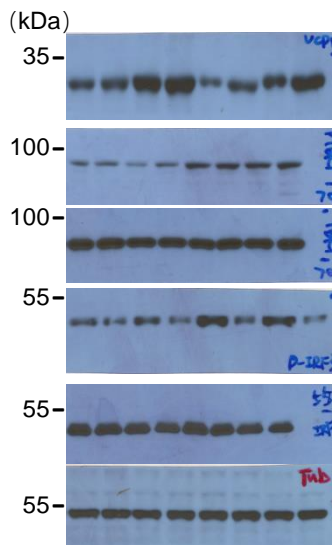

**Fig. 4i**

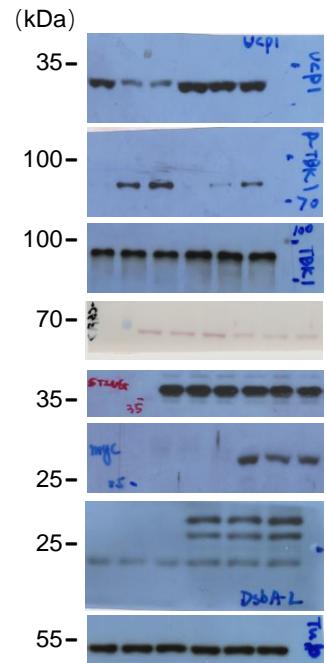

**Fig. 5a**

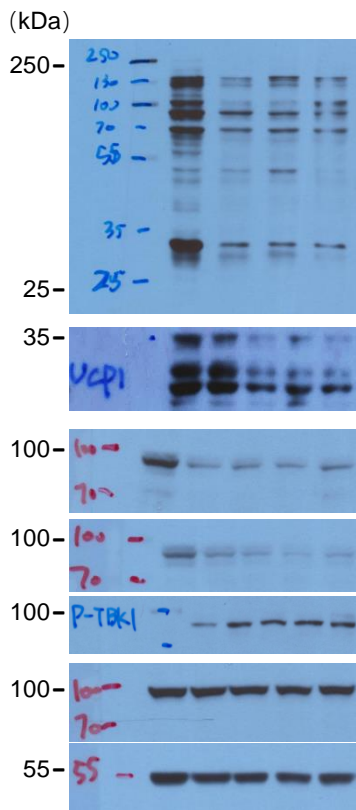

**Fig. 5b**

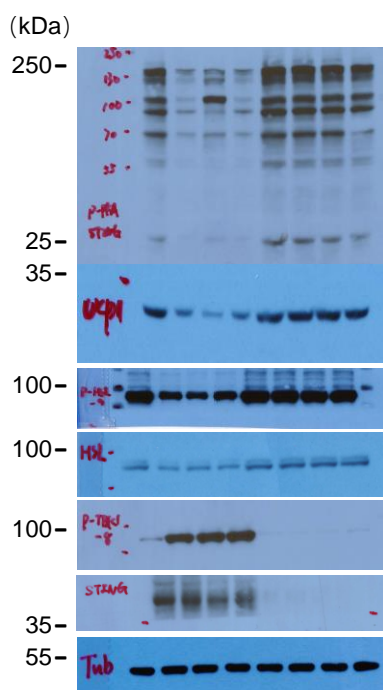

**Fig. 5c**

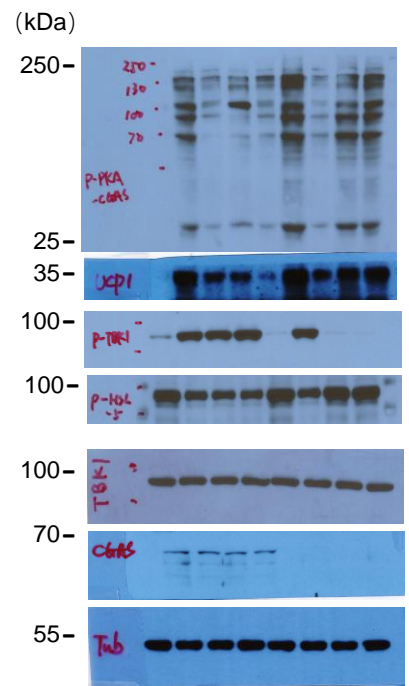

**Fig. 5d & Fig. 5e**

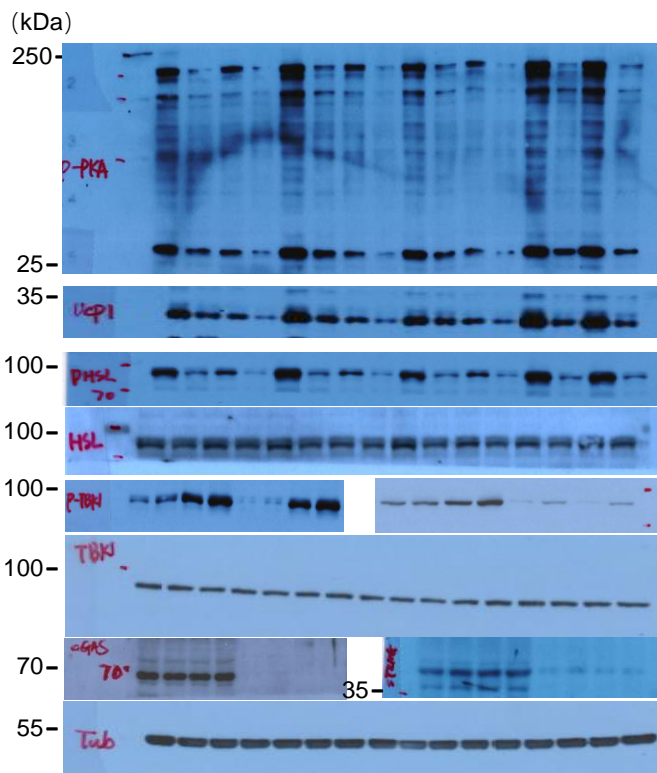

**Fig. 5f**

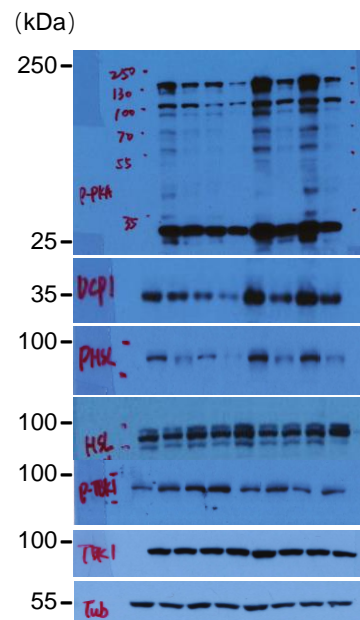

**Fig. 6a**

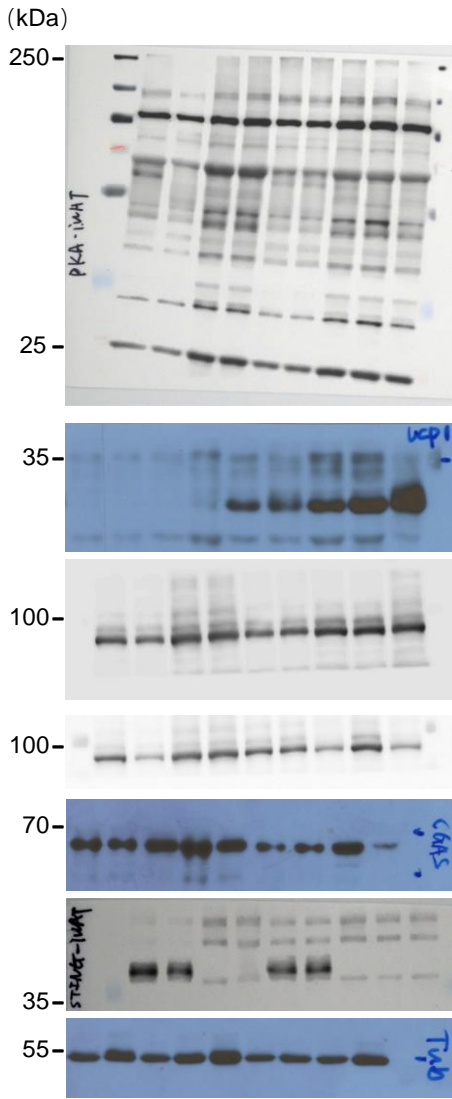

**Fig. 6b**

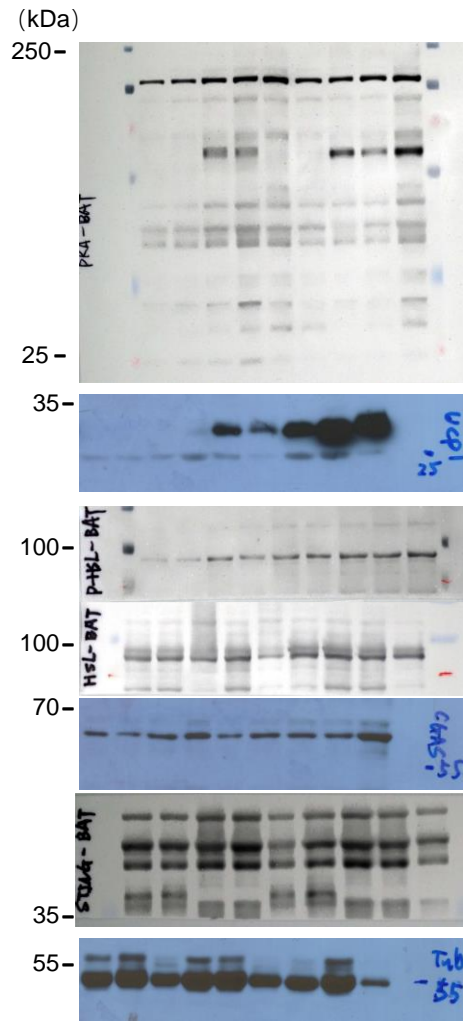

**Fig. 6d**

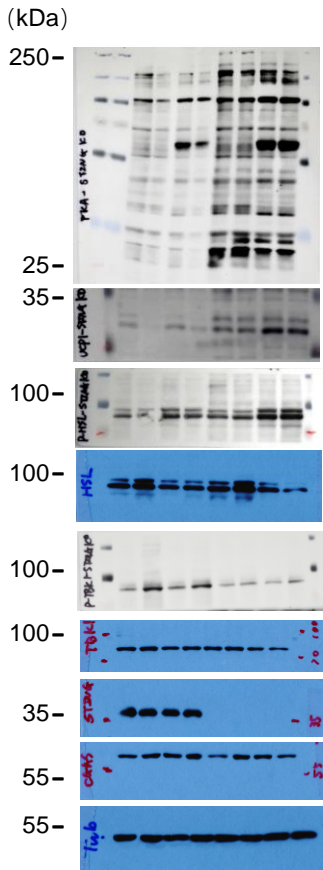

**Fig. 6e**

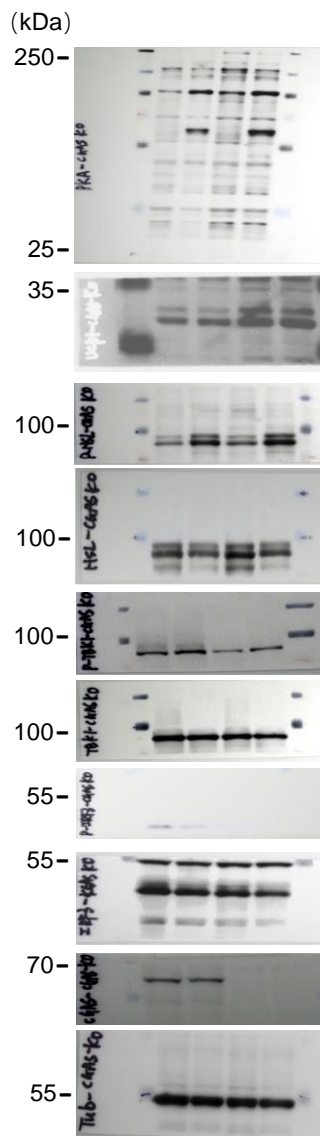

**Fig. 6h**

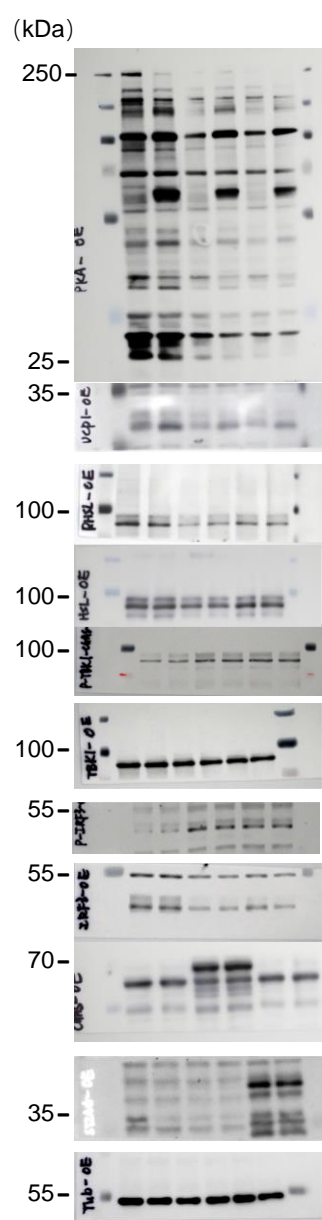

### Suppl Fig.1a

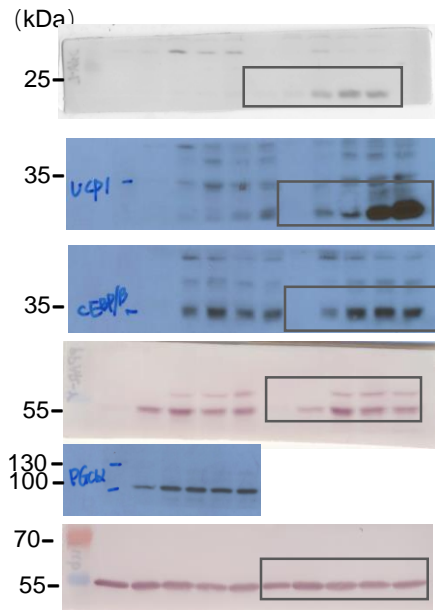

### Suppl Fig.1b

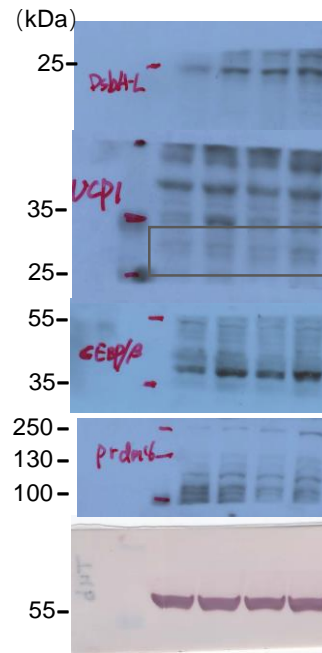

### Suppl Fig.3a

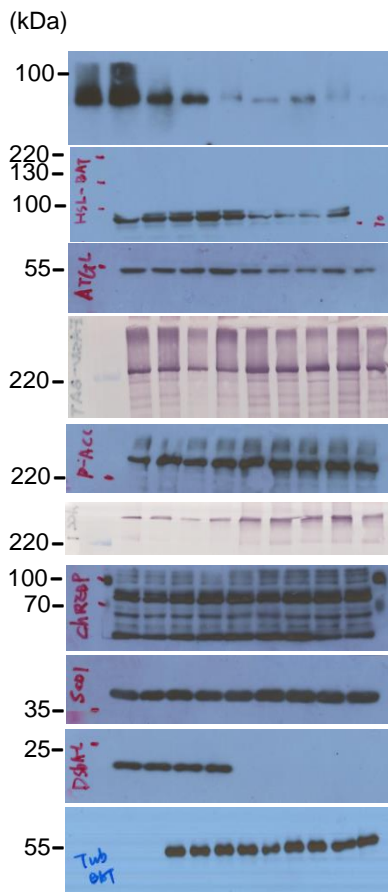

### Suppl Fig.3b

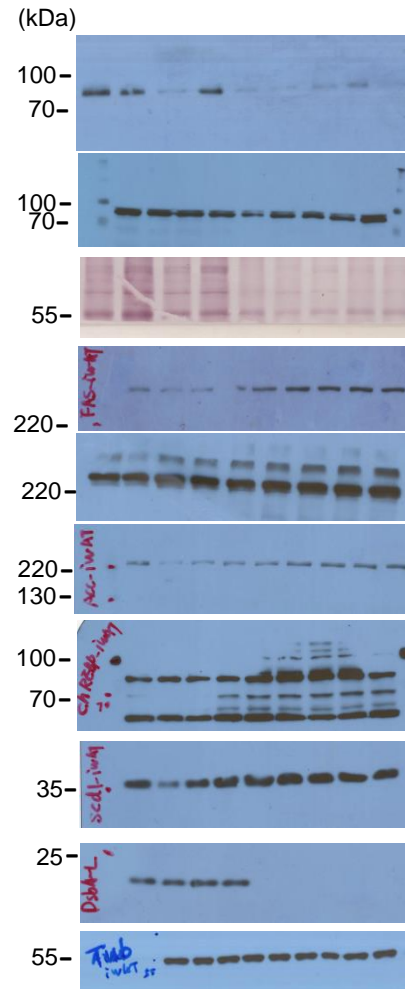

## Suppl Fig. 4b

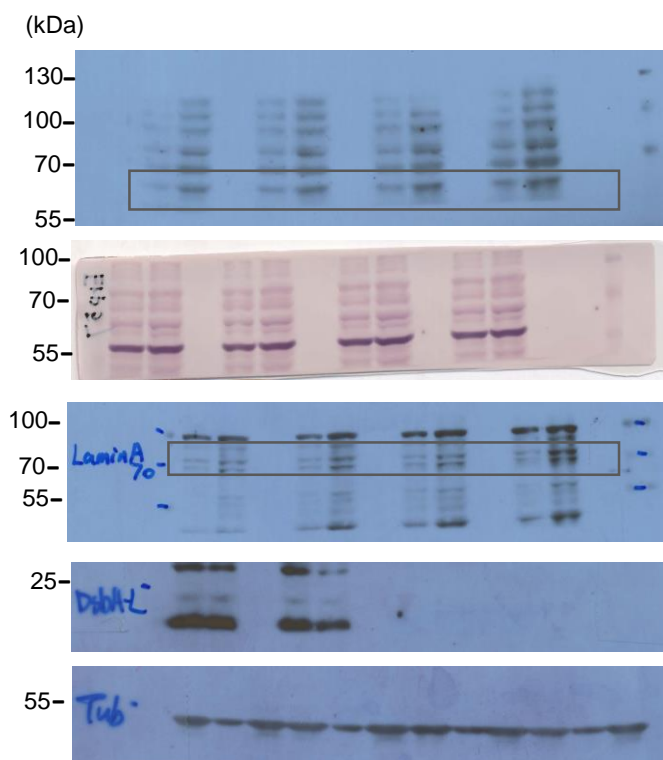

## Suppl Fig. 5e

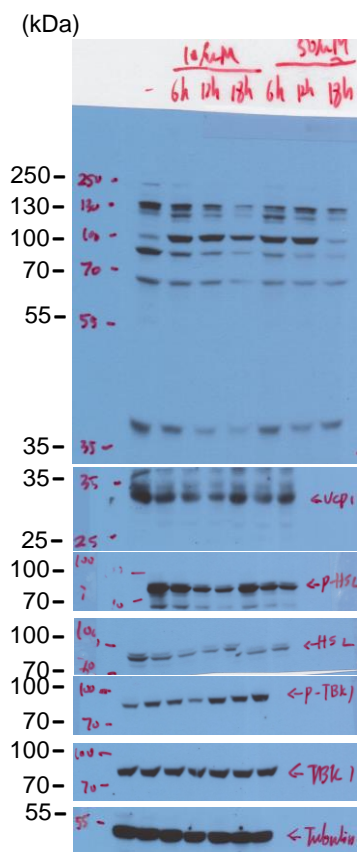

## Suppl Fig. 5f

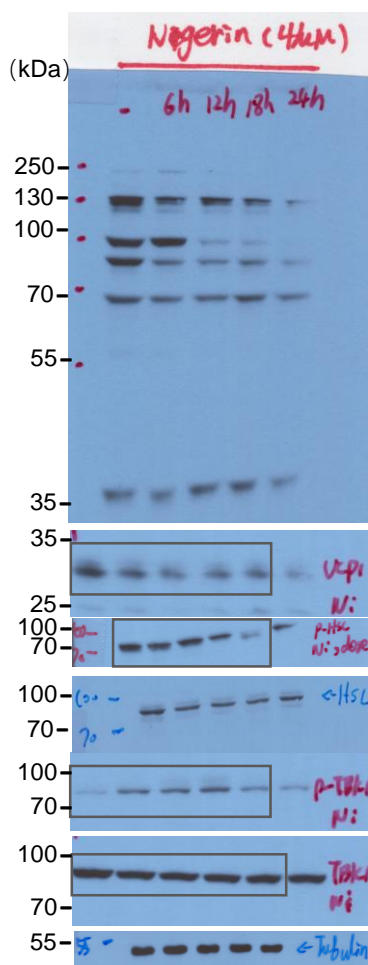

**Suppl Fig. 5c**

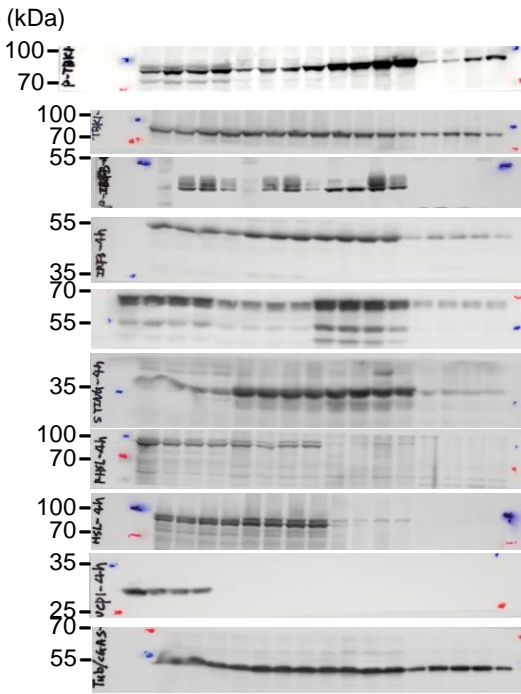

**Suppl Fig. 5d**

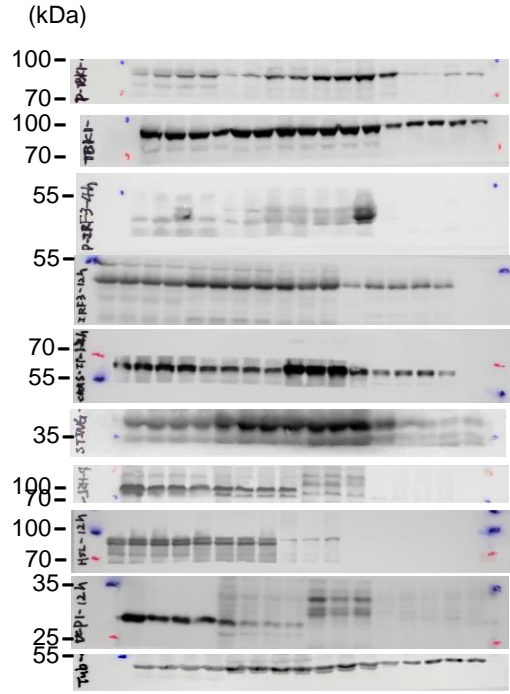

**Suppl Fig. 6a**

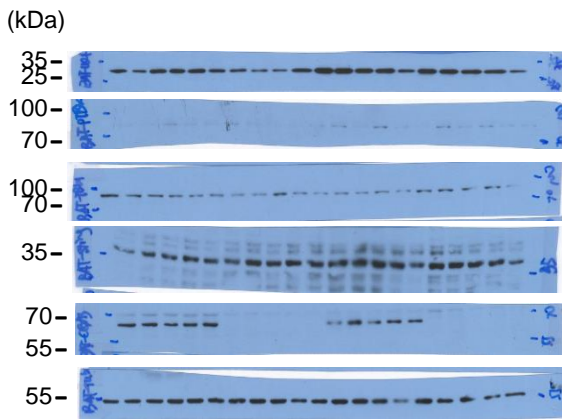

**Suppl Fig. 6b**

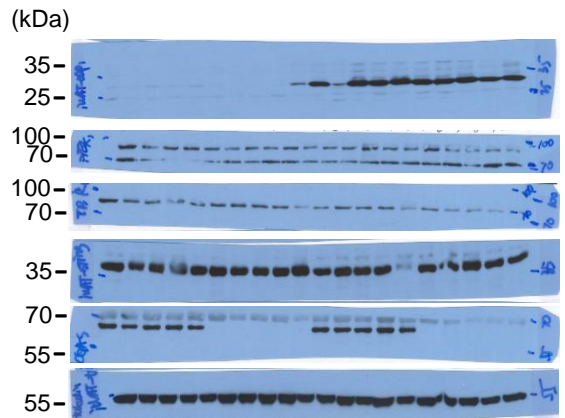

**Supplementary Table 1: Primer pair sequences**

| Gene    | Primer  | Sequence                         | Gene    | Primer  | Sequence                             |
|---------|---------|----------------------------------|---------|---------|--------------------------------------|
| DsbA-L  | Forward | 5'-ATGGATGCGTGTATGGTCTC-3'       | SREBP1  | Forward | 5'-CCCTGTGTGTACTGGCCTT-3'            |
|         | Reverse | 5'-CAACAGTGGTGGGTAGCG-3'         |         | Reverse | 5'-TTGCGATGTCTCCAGAAGTG-3'           |
| UCP1    | Forward | 5'-AAGACAGAAGAGCATAGCATTAC-3'    | SREBP2  | Forward | 5'-AAGCTGGGCGATGGATGAG-3'            |
|         | Reverse | 5'-CCAGTCATACACTCCCACCTC-3'      |         | Reverse | 5'-ATCTCGTCGATGTCCCG-3'              |
| C/EBPβ  | Forward | 5'-TTCCTCTCCGACCTCTTC-3'         | ChREBP  | Forward | 5'-CTGGGGACCTAAACAGGAGC-3'           |
|         | Reverse | 5'-GCTCACGTAACCGTAGTC-3'         |         | Reverse | 5'-GAAGCCACCCTATAGCTCCC-3'           |
| PGC1α   | Forward | 5'-CCGAAGACACTACAGTTCCATAG-3'    | SCD1    | Forward | 5'-CGCTGGCACATCAACTTCAC-3'           |
|         | Reverse | 5'-GGGAGGGAGAGAGGAGAGAGG-3'      |         | Reverse | 5'-CCCTGTGTGTACTGGCCTT-3'            |
| Prdm16  | Forward | 5'-TGAGGAAGCATTGAAAGTTAAAG-3'    | FASN    | Forward | 5'-TCGTCTATACCCTGCTTACTAC-3'         |
|         | Reverse | 5'-GTTCTTAGCCTGCCTGTAC-3'        |         | Reverse | 5'-ACACCACCTGAACCTGAG-3'             |
| PPARγ   | Forward | 5'-TGTGGACCTCTCCGTGATGG-3'       | ACC1    | Forward | 5'-TGCCACCACCTTATCACTATGTA-3'        |
|         | Reverse | 5'-GGTCTACTTTGATCGACTTTGG-3'     |         | Reverse | 5'-CCTGCCTGTCTCCATCCA-3'             |
| Tbx-1   | Forward | 5'-GCGGAAGGAAGTGGTATT-3'         | ACC2    | Forward | 5'-CCAACAGTAAGGTGGAAGCC-3'           |
|         | Reverse | 5'-CTCTCTCGGTCGTCTACA-3'         |         | Reverse | 5'-CAGGGAGTTTCTCTGCTGAC-3'           |
| Tmem26  | Forward | 5'-GTCTCTACAACCTCTGCTCTG-3'      | CD36    | Forward | 5'-ATTCCCTTGGCAACCAACCA-3'           |
|         | Reverse | 5'-TGTGCTATGCCGTTCTGTCTAC-3'     |         | Reverse | 5'-TACGTGGCCCGTTCTACTA-3'            |
| Cidea   | Forward | 5'-CCAAGGTCGGGTCAAGTCGTC-3'      | LPL     | Forward | 5'-GGCTGACACTGGACAAAACAAA-3'         |
|         | Reverse | 5'-CGTAGTCCCTGGCGGTCTCC-3'       |         | Reverse | 5'-CCTGGGTAGCCACCCTTTA-3'            |
| β-actin | Forward | 5'-GTTGGTTGGAGCAAACATC-3'        | FATP5   | Forward | 5'-AGGACCAGCTGCATCCTTC-3'            |
|         | Reverse | 5'-CTTATTTCATGGATACTTGGAAATG-3'  |         | Reverse | 5'-TCTCCTACGCGTCGTACATTC-3'          |
| HSL     | Forward | 5'-TGTGTCTAGTGCTTATCAG-3'        | mt-DNA  | Forward | 5'-AATCTACCATCCTCCGTGAAACC-3'        |
|         | Reverse | 5'-GAACAGCGAAGTGTCTCT-3'         | Loop1   | Reverse | 5'-TCAGTTTAGCTACCCCAAGTTAA-3'        |
| ATGL    | Forward | 5'-GCTGTGGAATGAGGACATAGGA-3'     | mt-DNA  | Forward | 5'-CCCTTCCCATTGGTCT-3'               |
|         | Reverse | 5'-GCATAGTGAGTGGCTGGTGAA-3'      | Loop2   | Reverse | 5'-TGGTTTACGGAGGATGG-3'              |
| CPT1    | Forward | 5'-ACTCCGCTCGCTCATTCCG-3'        | mt-DNA  | Forward | 5'-TCCTCCGTGAAACCAACAA-3'            |
|         | Reverse | 5'-CACACCCACCACCAGATAA-3'        | Loop3   | Reverse | 5'-AGCGAGAAGAGGGGCATT-3'             |
| MCAD    | Forward | 5'-GATCGCAATGGGTGCTTTTGATAGAA-3' | mt-ND4  | Forward | 5'-AACGGATCCACAGCCGTA-3'             |
|         | Reverse | 5'-AGCTGATTGGCAATGTCTCCAGCAA-3'  |         | Reverse | 5'-AGTCCTTCGGGCCATGATT-3'            |
| HMGCS2  | Forward | 5'-ATACCACCAACGCTGTTATGG-3'      | CYTB    | Forward | 5'-GCTTTCCAATTTCATCTTACCATTTA-3'     |
|         | Reverse | 5'-CAATGTCACCACAGACCAG-3'        |         | Reverse | 5'-TGTTGGGTTGTTTGTCTCTG-3'           |
| PPARα   | Forward | 5'-TCGCTATCCAGGCAGAAG-3'         | Tert    | Forward | 5'-CTAGTCTATGTGTCAAGACCCTCTT-3'      |
|         | Reverse | 5'-ACCACAGACCAACCAAGT-3'         |         | Reverse | 5'-GCCAGCACGTTTCTCTCGTT-3'           |
| Ckmt1   | Forward | 5'-TGAGGAGACCTATGAGGTATTTGC-3'   | Ckmt2   | Forward | 5'-GCATGGTGGCTGGTGATGAG-3'           |
|         | Reverse | 5'-TCATCAAAGTAGCCAGAACGGA-3'     |         | Reverse | 5'-AAACTGCCCGTGAGTAATCTTG-3'         |
| Gamt    | Forward | 5'-GCAGCCACATAAGTTGTTCC-3'       | Gatm    | Forward | 5'-GACCTGGTCTTGTGCTCTCC-3'           |
|         | Reverse | 5'-CTTTCAGACAGCGGTACG-3'         |         | Reverse | 5'-GGGATGACTGGTGTGGAGG-3'            |
| Slc6a8  | Forward | 5'-TGCATATCTCCAAGGTGGCAG-3'      | Serca1  | Forward | 5'-TGTTTGTCTATTTCCGGGTG-3'           |
|         | Reverse | 5'-CTACAAACTGGCTGTCCAGA-3'       |         | Reverse | 5'-AATCCGCACAAGCAGGTCTTC-3'          |
| Serca2a | Forward | 5'-GCTCATTTCCAGATCACACCG-3'      | Serca2b | Forward | 5'-ACTTTGCCGCTCATTTCCAG-3'           |
|         | Reverse | 5'-GTTACTCCAGTATTGCGGGTTG-3'     |         | Reverse | 5'-AGGCTGCACACACTTTTACC-3'           |
| Serca3  | Forward | 5'-GGAGCAGTTGAGGACCTCTT-3'       | Fabp4   | Forward | 5'-AAGGTG AAGAGC ATCATA ACCCT-3'     |
|         | Reverse | 5'-GGCCACGAGAATTAGCATGATG-3'     |         | Reverse | 5'-TCA CGC CTT TCA TAA CAC ATT CC-3' |
