# Supplementary material for: Mitochondrial stress-activated cGAS-STING pathway inhibits thermogenic program and contributes to overnutrition-induced obesity in mice
Source: PubMed Central journal article supplement (PMC7244732; doi:10.1038/s42003-020-0986-1), 2020-05-22
Supplement: 42003_2020_986_MOESM3_ESM.pdf [file 42003_2020_986_MOESM3_ESM.pdf]

## Description of Additional Supplementary Files

**File Name:** Supplementary Data 1

**Description:** source data
